# Supplementary material for: Matrix Selection for the Visualization of Small Molecules and Lipids in Brain Tumors Using Untargeted MALDI-TOF Mass Spectrometry Imaging
Source: MDPI journal article supplement (doi:10.3390/metabo13111139), 2023-11-09
Supplement: s1 [file s1]

(a)

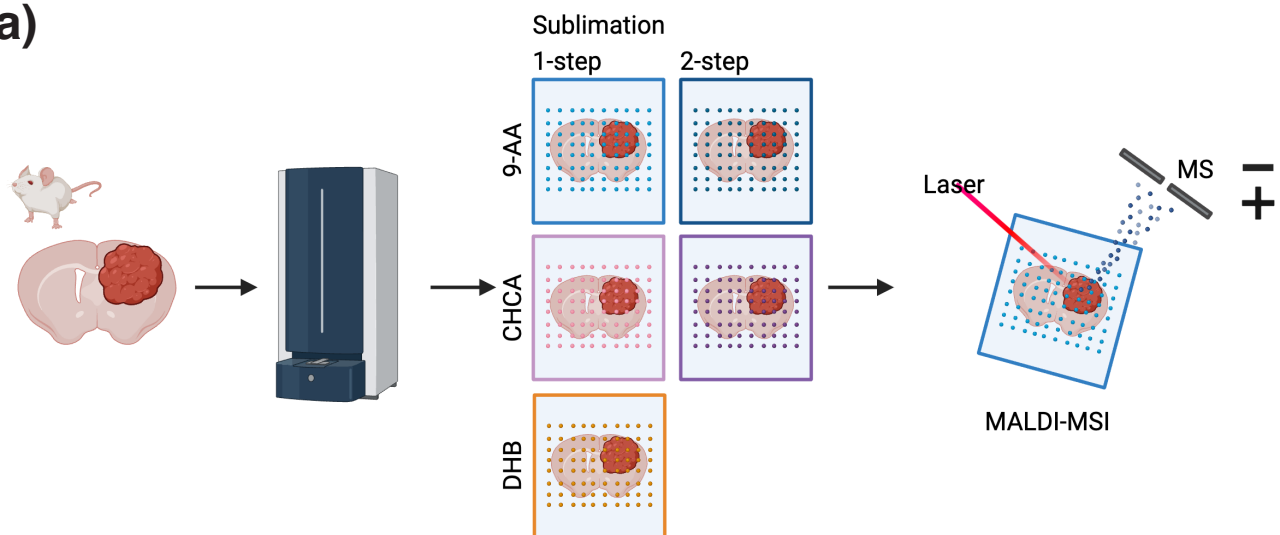

(b)

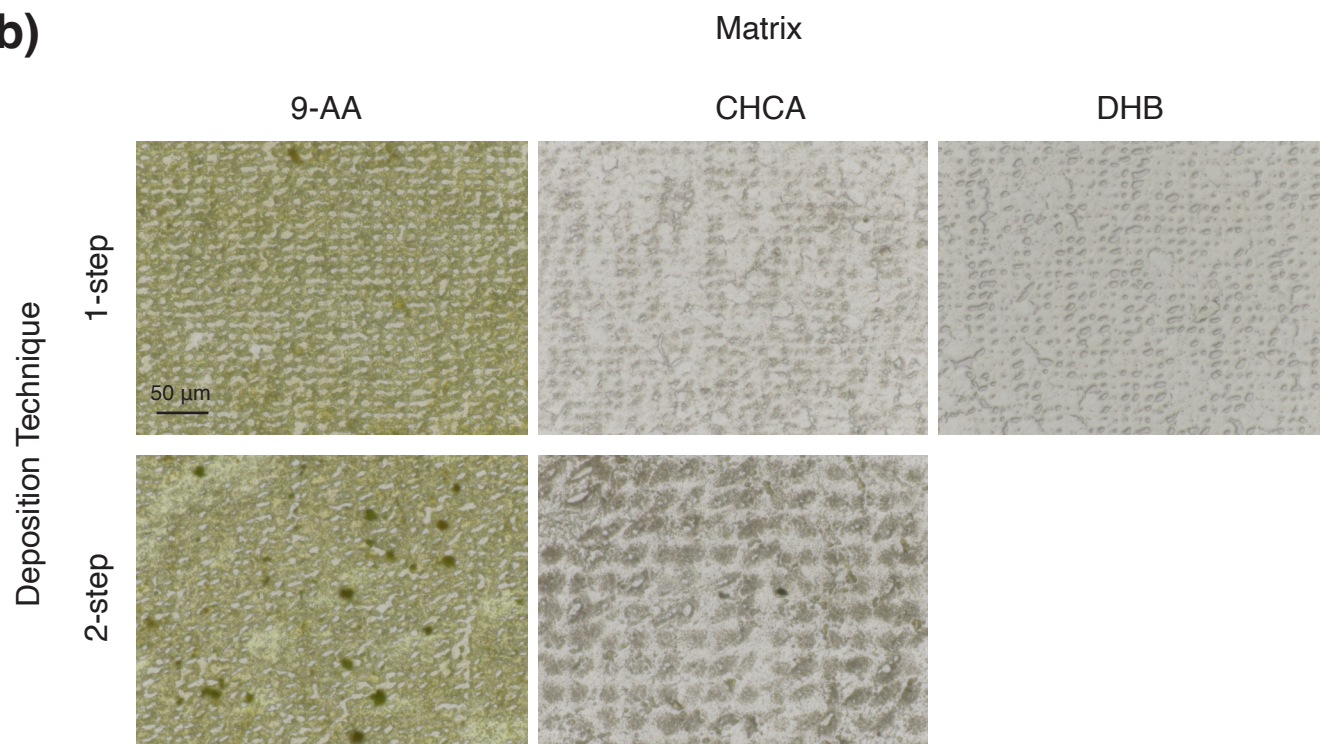

(c)

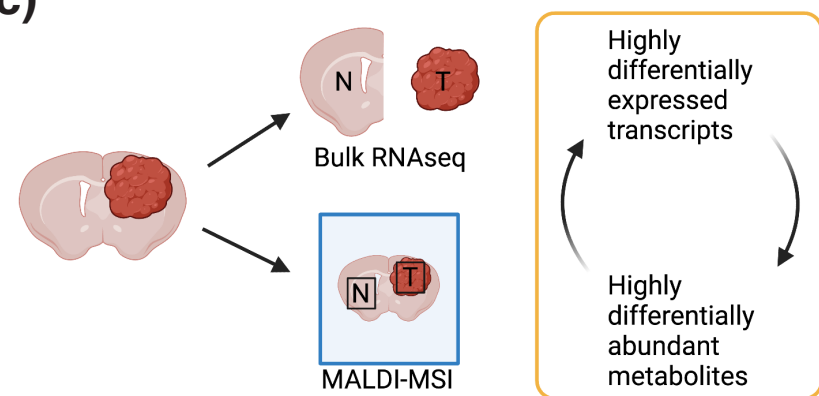

**Supplementary Material Figure S1.** Experimental designs. (a) Experimental design for matrix comparison with CT-2A tumors; (b) Microscopy of MALDI-analyzed CT-2A tumors highlighting laser destruction of tissue; scale, 50  $\mu\text{m}$ ; (c) Experimental design for validation of MALDI-TOF using bulk RNA-seq.

**(a)**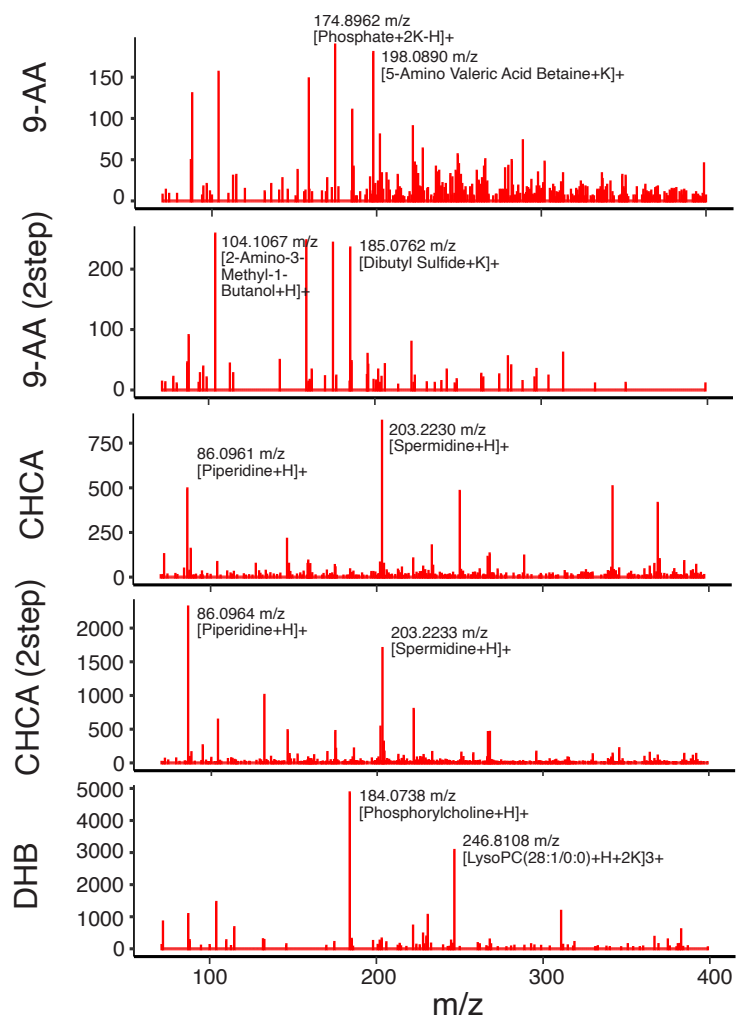**Negative Polarity**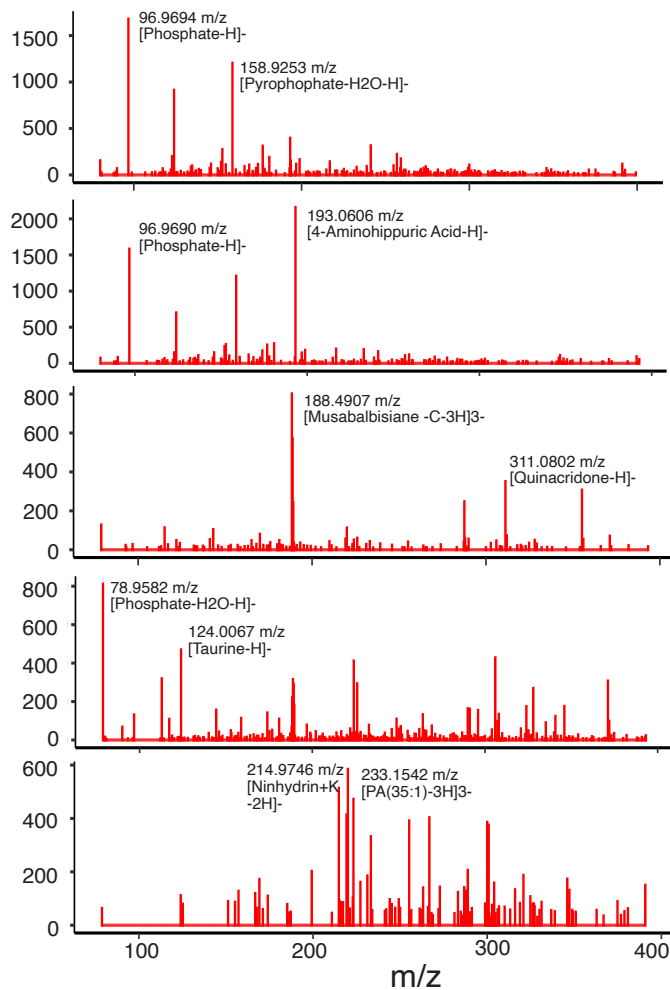**(b)****Positive Polarity**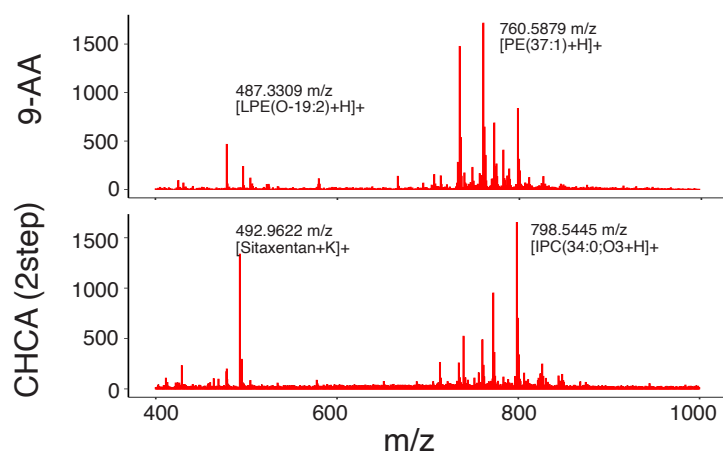**Negative Polarity**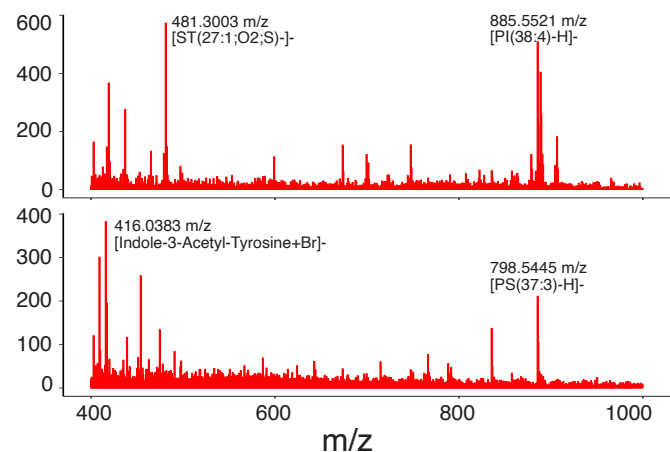

**Supplementary Material Figure S2.** Spectra for atmospheric-pressure MALDI-TOF MSI. **(a)** Spectra obtained for each sample preparation in small molecule screen with CT-2A glioma using atmospheric-pressure MALDI-TOF MSI; **(b)** Spectra obtained for each sample preparation in lipid screen with CT-2A glioma using atmospheric-pressure MALDI-TOF MSI.

**(a)**

Small molecules

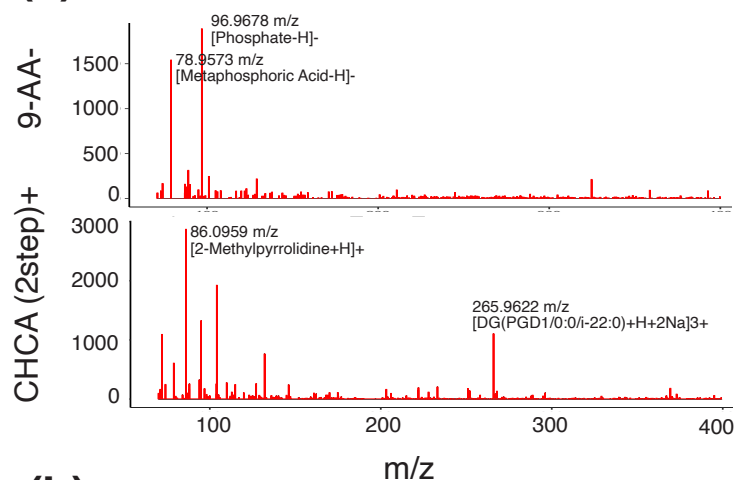

Lipids

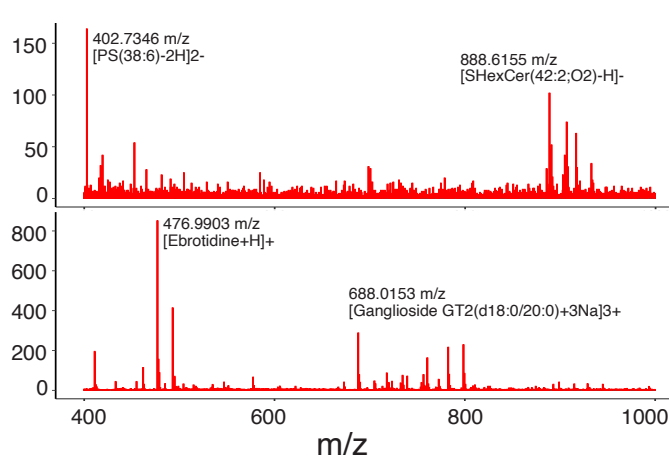**(b)**

Tumour

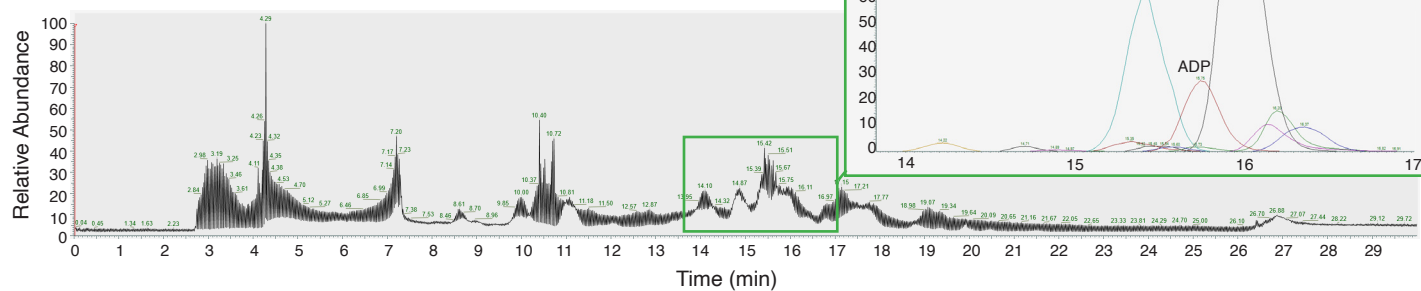

Normal

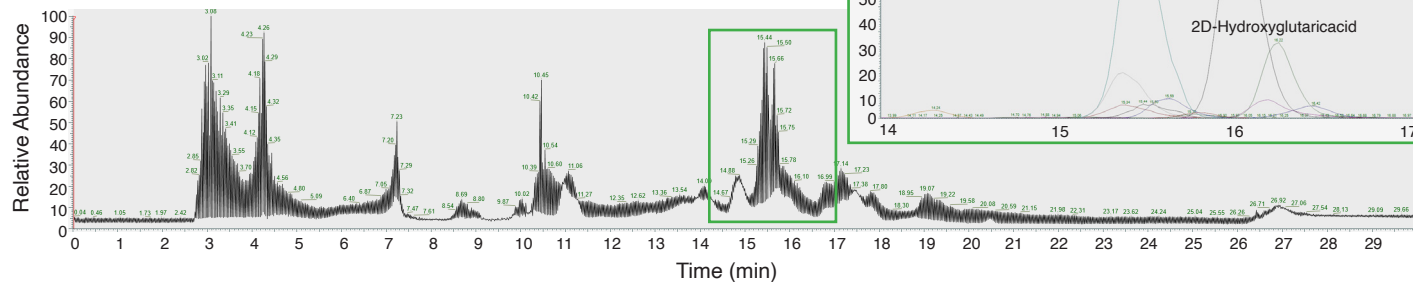**(c)**

173.1035-173.1053 m/z

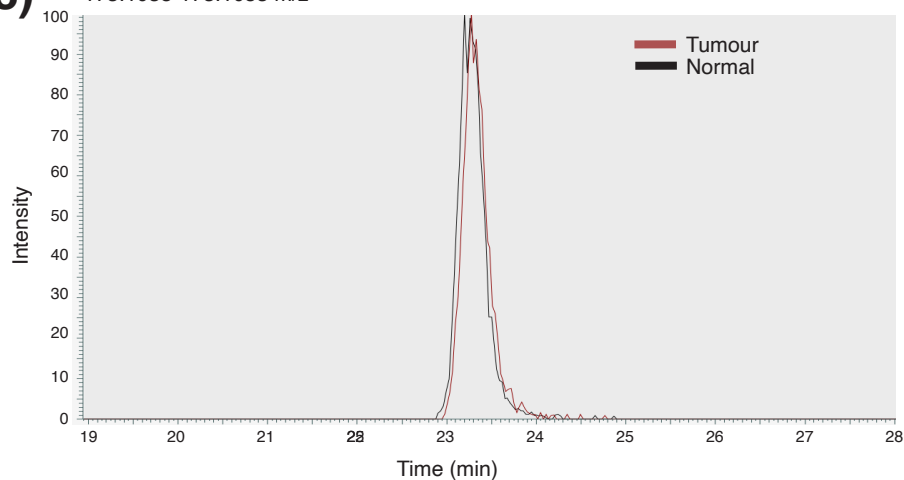

**Supplementary Material Figure S3.** Spectra for human samples and chromatograms for LC-MS. **(a)** Spectra for human samples obtained for each sample preparation in small molecules screen (left) and lipid screen (right); **(b)** Top shows chromatogram for tumor sample bottom shows chromatogram for normal sample as obtained with LC-MS; **(c)** Extracted ion chromatogram for Arginine.

(a)

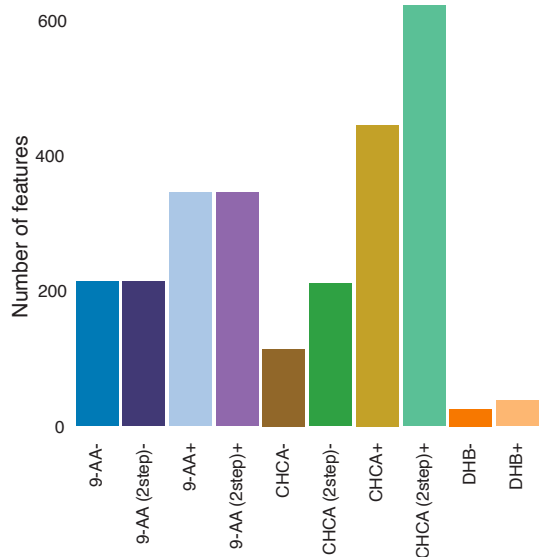

(b)

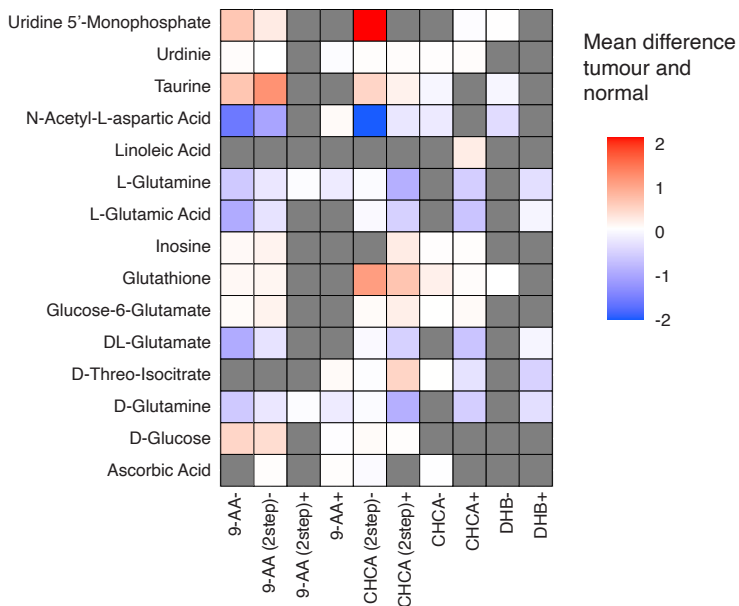

(c)

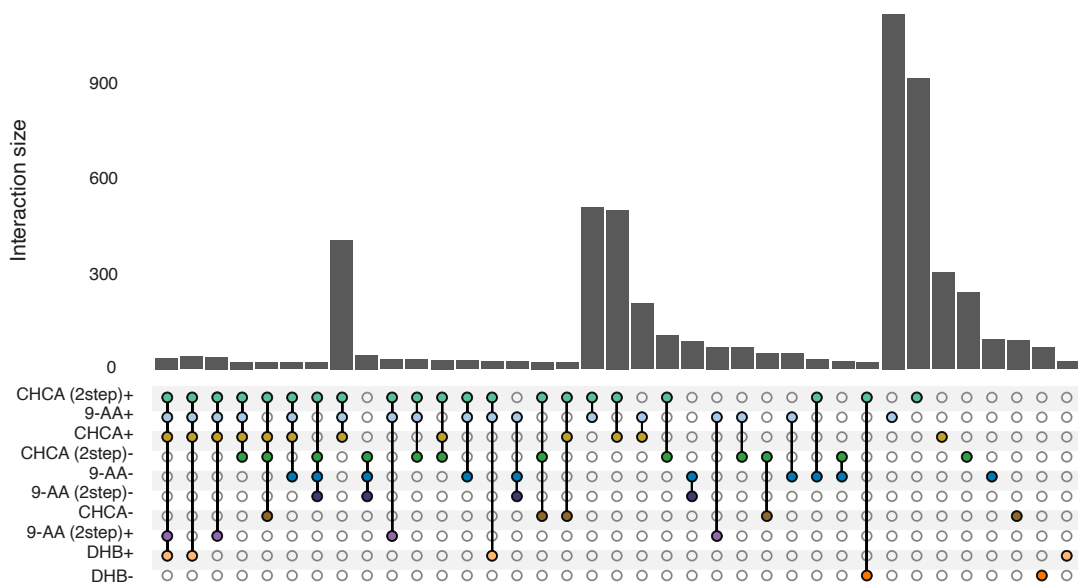

(d)

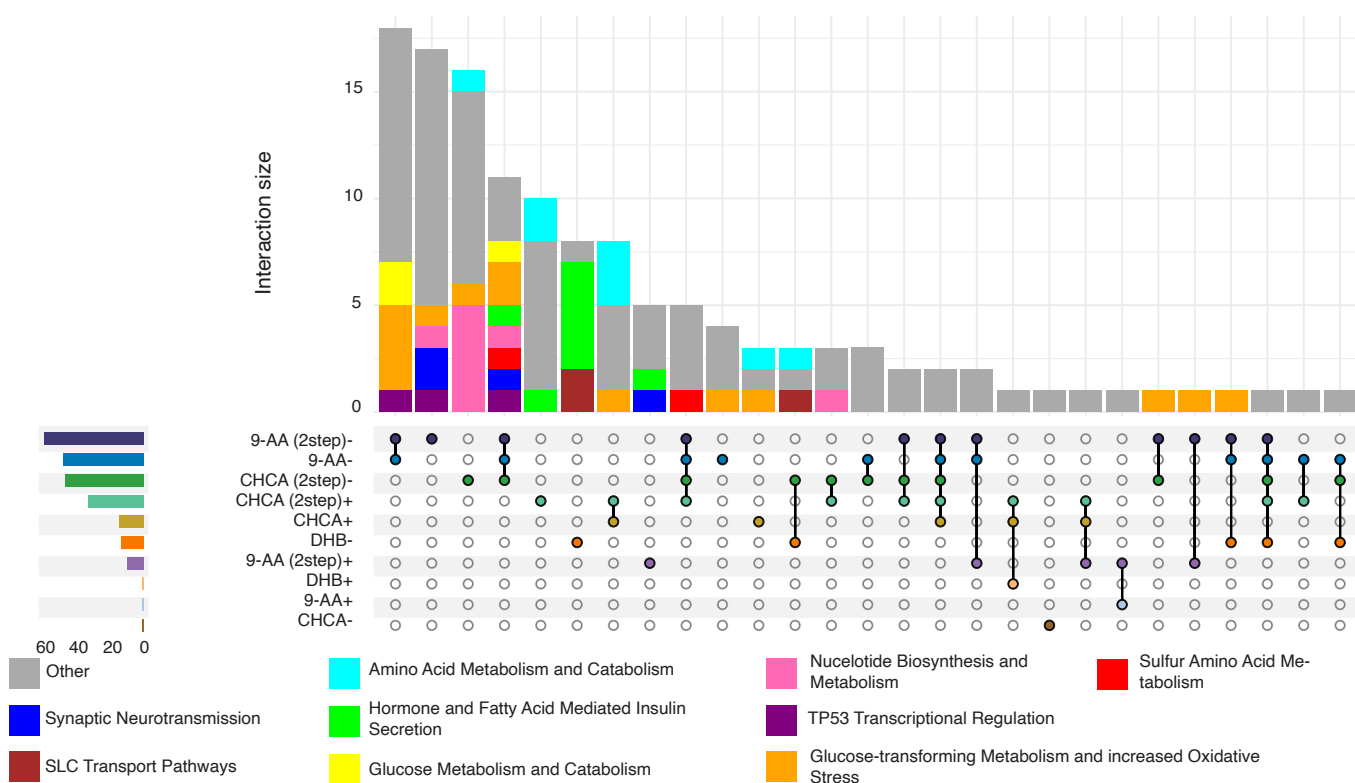

**Supplementary Material Figure S4.** Further comparisons between matrix and polarity combinations for MALDI-TOF for small molecules. **(a)** Number of unique background peaks for each combination in small molecule screen; **(b)** Mean difference in abundance of metabolites of interest between tumor and normal regions with grey color representing metabolites not detectable; **(c)** Upset plot representing a Venn diagram of sizes of overlaps between detectable chemical formulas for different sets of matrix and polarity combinations; **(d)** Upset plot representing a Venn diagram of sizes of overlaps between enriched pathways for different sets of matrix and polarity combinations colored by semantic groups of pathways.



(a)

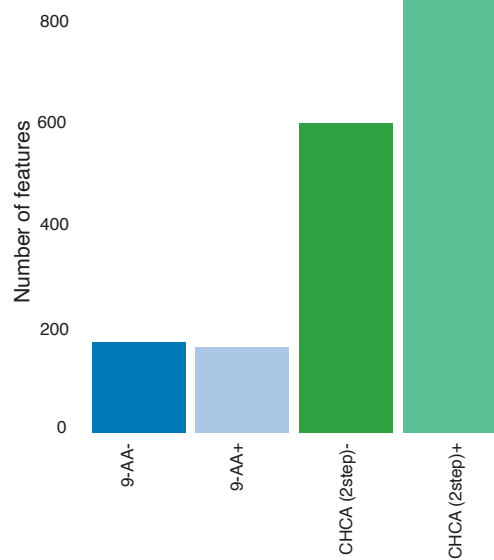

(b)

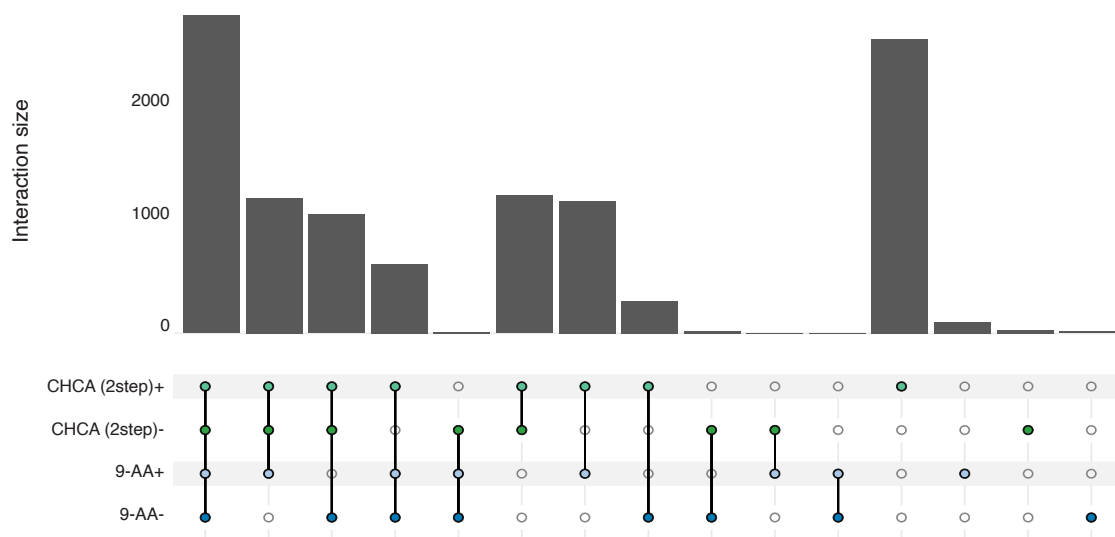

(c)

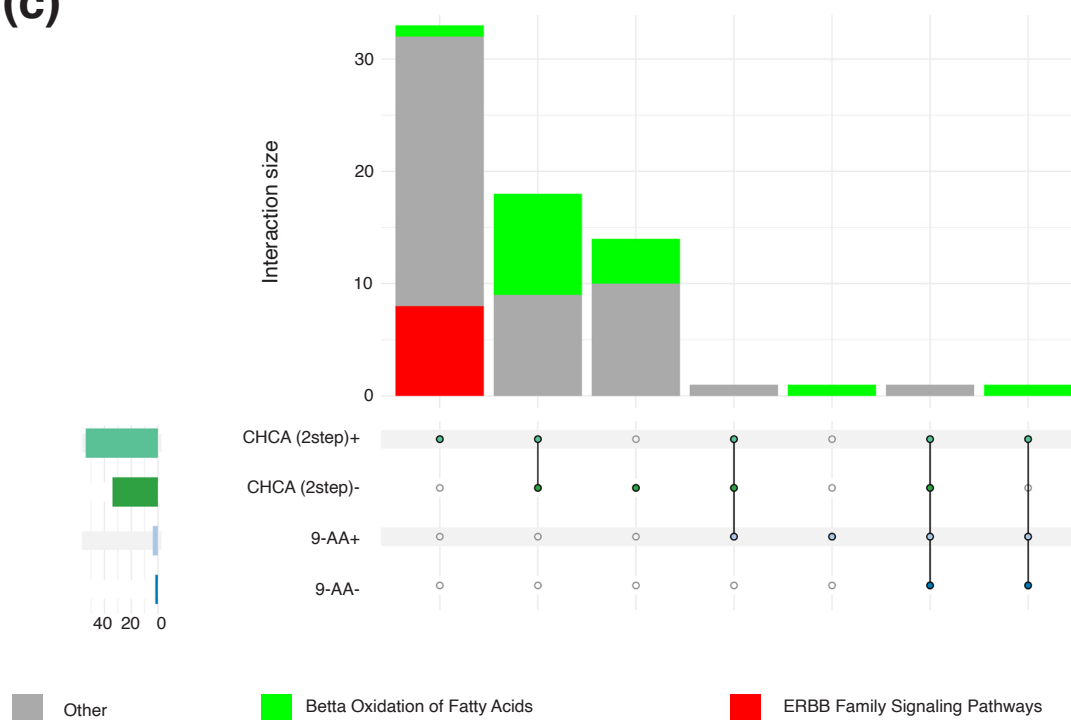

**Supplementary Material Figure S5.** Further comparisons between matrix and polarity combinations for MALDI-TOF for lipids. **(a)** Number of unique background peaks for each combination in small molecule screen; **(b)** Upset plot representing a Venn diagram of sizes of overlaps between detectable chemical formulas for different sets of matrix and polarity combinations; **(c)** Upset plot representing a Venn diagram of sizes of overlaps between enriched pathways for different sets of matrix and polarity combinations colored by semantic groups of pathways.

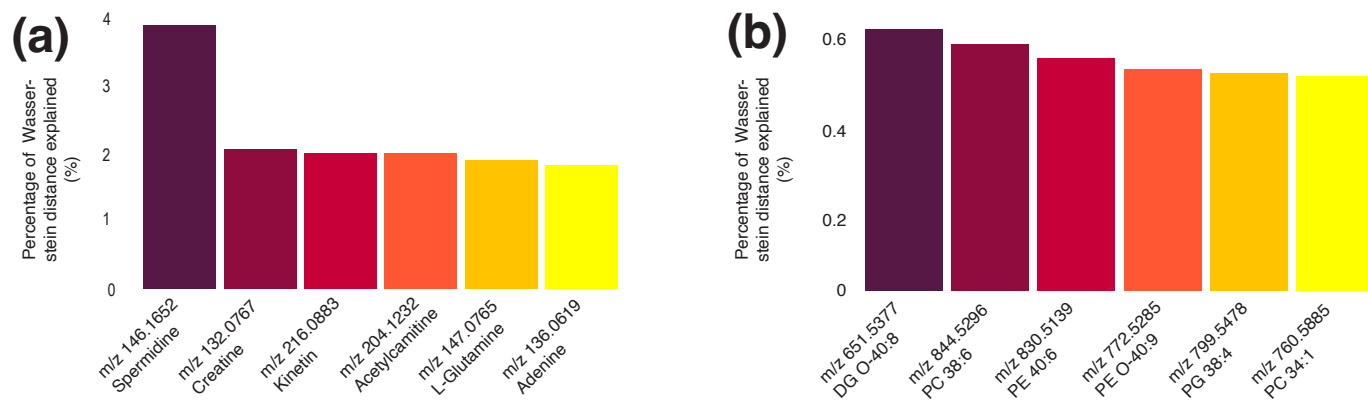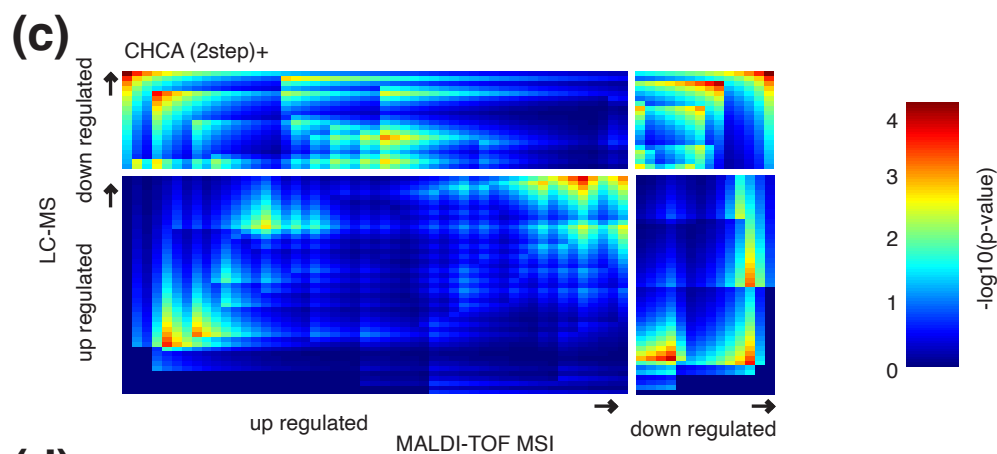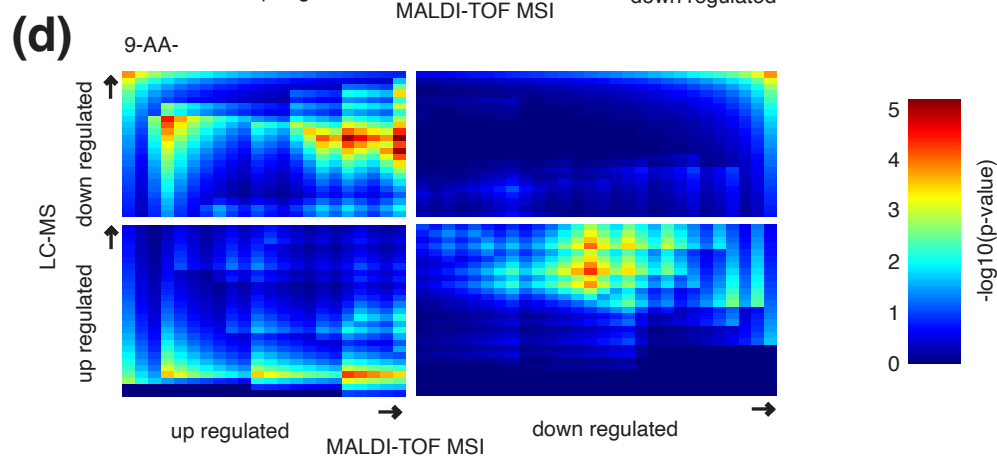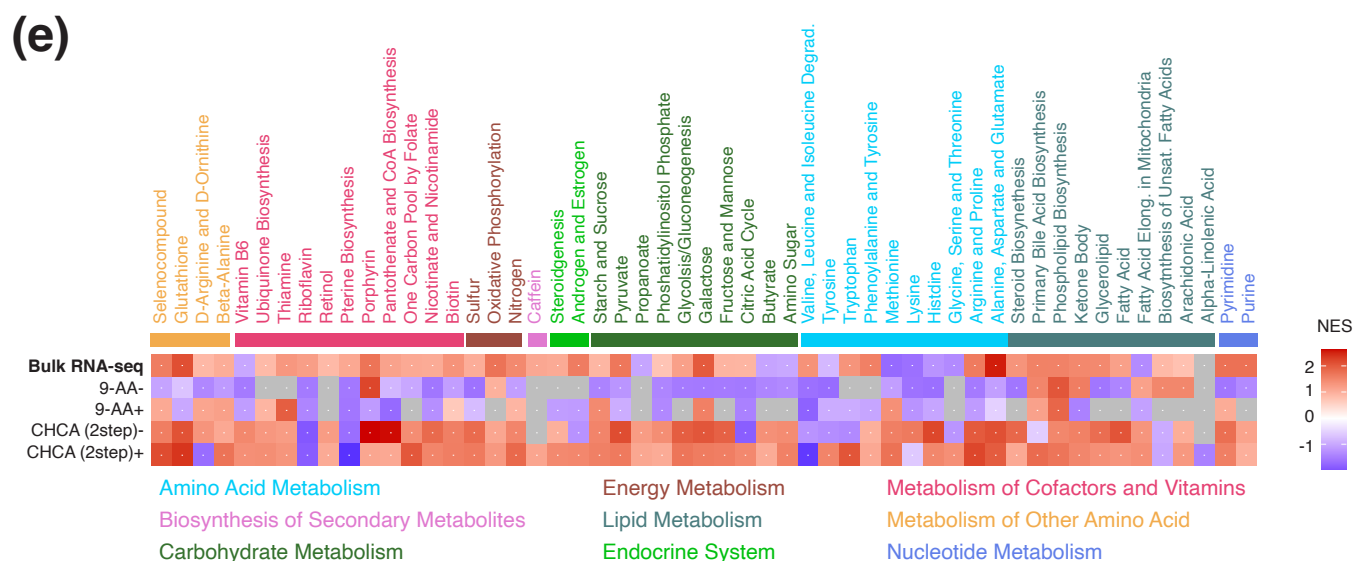

**Supplementary Material Figure S6.** Extended differential metabolite abundance between tumor and normal regions. (a) Percentage of total Wasserstein distance between tumor and normal regions explained by top 6 differentially abundant m/z peak bins for small molecule screen; (b) Percentage of total Wasserstein distance between tumor and normal regions explained by top 6 differentially abundant m/z peak bins for lipid screen; (c) Rank-rank hypergeometric overlap plots between LC-MS and MALDI-TOF MSI differential abundance results of small molecules for recrystallized CHCA matrix in positive polarity mode; smaller p-values indicate larger overlap between ranked lists; (d) Rank-rank hypergeometric overlap plots between LC-MS and MALDI-TOF MSI differential abundance results of small molecules for 9-AA matrix in negative polarity mode; smaller p-values indicate larger overlap between ranked lists; (e) Normalized enrichment score for KEGG pathways for each combination and bulk RNA-sequencing of tumor and normal regions for lipid screen.
